# Supplementary material for: Integrative species delimitation helps to find the hidden diversity of the leaf-litter frog Ischnocnema manezinho (Garcia, 1996) (Anura, Brachycephalidae), endemic to the southern Atlantic Forest
Source: PeerJ. 2023 May 25;11:e15393. doi: 10.7717/peerj.15393 (PMC10225124; doi:10.7717/peerj.15393)
Supplement: Supplemental Information 4 [file peerj-11-15393-s004.xlsx]

## Sheet: Table S1
Table S1 - Specimens, localities, geographic coordinates, voucher ID and its Herpetological collections analyzed. UCS = Uncorfirmed species, UFMG = Centro de Coleções Taxonômicas, Universidade Federal de Minas Gerais; MNRJ = Museu Nacional, Universidade Federal do Rio de Janeiro; CHUFSC = Coleção Herpetológica Universidade Federal de Santa Catarina; CFBH = "Célio Fernando Baptista Haddad", Univer…
Species	Voucher ID	DNA ID	Type of data			N° extraction	mtDNA Haplotype (H: Fig. 2)	Municipally/State	Locality	Longitude (W)	Latitude (S)	GenBank acession numbers
			Genetic	Morphometric	Acoustic							Cyt-b	α-fib	β-fib	cxc
Ischnocnema manezinho	UFMG 18676	UFMG-T 7238	x	x		IM01	H20	Florianópolis/SC	Poção	-48.5051	-27.6145	OP270141	OP270087/OP270088	OP185393/OP185394	OP185448/OP185449
Ischnocnema manezinho	UFMG 18677	UFMG-T 7239	x	x	x	IM02	H20	Florianópolis/SC	Poção	-48.5051	-27.6145	OP270141	OP270089/OP270089	OP185395/OP185396	OP185450/OP185451
Ischnocnema manezinho	UFMG 18678	UFMG-T 7240	x	x	x	IM03	H20	Florianópolis/SC	Poção	-48.5051	-27.6145	OP270141	OP270089/OP270088	OP185395/OP185396	OP185452/OP185451
UCS2	UFMG 18679	UFMG-T 7241	x	x	x	IM04	H11	São Bento do Sul/SC	CEPA Rugendas	-49.3071	-26.3196	OP270129	OP270090/OP270090	OP185397/OP185398	OP185453/OP185454
UCS2	UFMG 18680	UFMG-T 7242	x	x	x	IM05	H11	São Bento do Sul/SC	CEPA Rugendas	-49.3071	-26.3196	OP270129	OP270090/OP270090	OP185397/OP185398	OP185455/OP185455
UCS2	UFMG 9974	UFMG-T 1913	x	x		IM06	H5	São Francisco do Sul/SC	CEPA Vila da Glória	-48.6862	-26.2243	OP270123	OP270090/OP270090	OP185399/OP185400	OP185456/OP185454
UCS4	UFMG 7064	UFMG-T 852	x			IM07	H28	São Bonifácio/SC	Gruta São José	-48.9648	-27.8308	OP270146	OP270091/OP270091	OP185401/OP185402	OP185457/OP185457
Ischnocnema manezinho	UFMG 17509	UFMG-T 7230	x			IM09	H21	Florianópolis/SC	Poção	-48.5051	-27.6145	OP270142	OP270092/OP270088	OP185395/OP185396	OP185458/OP185451
UCS4	UFMG 7653	UFMG-T 7229	x	x		IM10	H28	Blumenau/SC	Parque Nacional da Serra do Itajaí	-49.1321	-27.0777	OP270146	OP270091/OP270093	OP185403/OP185404	OP185459/OP185459
UCS4	UFMG 18513	UFMG-T 7233	x	x	x	IM11	H28	São Bonifácio/SC	Gruta São José	-48.9648	-27.8308	OP270146	OP270091/OP270091	OP185401/OP185402	OP185459/OP185457
UCS2	UFMG 18500	UFMG-T 7231	x	x	x	IM12	H10	São Bento do Sul/SC	CEPA Rugendas	-49.3071	-26.3196	OP270130	OP270094/OP270095	OP185397/OP185398	OP185452/OP185454
UCS4	UFMG 18510	UFMG-T 7232	x	x	x	IM13	H28	São Bonifácio/SC	Gruta São José	-48.9648	-27.8308	OP270146	OP270093/OP270093	OP185401/OP185405	OP185457/OP185457
UCS2	UFMG 18518	UFMG-T 7234	x	x	x	IM14	H10	São Bento do Sul/SC	Estrada Saraiva	-49.3547	-26.2944	OP270130	OP270090/OP270090	OP185397/OP185398	OP185454/OP185454
Ischnocnema manezinho	UFMG 18673	UFMG-T 7235	x	x	x	IM15	H14	Florianópolis/SC	UCAD	-48.4963	-27.5365	OP270133	OP270089/OP270096	OP185395/OP185396	OP185460/OP185451
UCS2	UFMG 18681	UFMG-T 7243	x	x	x	IM17	H10	São Bento do Sul/SC	Estrada Saraiva	-49.3547	-26.2944	OP270128	OP270090/OP270097	OP185406/OP185407	OP185454/OP185454
UCS1	CHUFSC 2950	CHUFSC 2950	x			IM19	H12	Florianópolis/SC	Lagoa do Peri	-48.5294	-27.7487	OP270131	OP270098/OP270099	OP185408/OP185409	OP185461/OP185461
Ischnocnema manezinho	CHUFSC 2958	CHUFSC 2958	x	x		IM20	H23	Florianópolis/SC	UCAD	-48.4963	-27.5365	OP270138	OP270089/OP270089	OP185395/OP185410	OP185462/OP185450
UCS1	CHUFSC 3018	CHUFSC 3018	x	x		IM21	H13	Florianópolis/SC	Lagoa do Peri	-48.5294	-27.7487	OP270132	OP270099/OP270100	OP185408/OP185409	OP185461/OP185461
UCS4	CHUFSC 3162	CHUFSC 3162	x	x	x	IM22	H29	Governador Celso Ramos/SC	Ilha do Arvoredo	-48.3639	-27.2906	OP270147	OP270091/OP270091	OP185411/OP185412	OP185457OP185457
UCS4	CHUFSC 3163	CHUFSC 3163	x	x	x	IM23	H29	Governador Celso Ramos/SC	Ilha do Arvoredo	-48.3639	-27.2906	OP270147	OP270091/OP270091	OP185411/OP185412	OP185457OP185457
UCS4	CHUFSC 3164	CHUFSC 3164	x	x	x	IM24	H29	Governador Celso Ramos/SC	Ilha do Arvoredo	-48.3639	-27.2906	OP270147	OP270091/OP270091	OP185411/OP185412	OP185457/OP185463
UCS4	CHUFSC 3165	CHUFSC 3165	x	x	x	IM25	H29	Governador Celso Ramos/SC	Ilha do Arvoredo	-48.3639	-27.2906	OP270147	OP270091/OP270091	OP185411/OP185412	OP185457/OP185457
UCS4	CHUFSC 3166	CHUFSC 3166	x			IM26	H29	Governador Celso Ramos/SC	Ilha do Arvoredo	-48.3639	-27.2906	OP270147	OP270091/OP270091	OP185411/OP185412	OP185457/OP185457
UCS4	CHUFSC 3167	CHUFSC 3167	x	x	x	IM27	H29	Governador Celso Ramos/SC	Ilha do Arvoredo	-48.3639	-27.2906	OP270147	OP270091/OP270091	OP185411/OP185412	OP185457/OP185457
UCS4	CHUFSC 3168	CHUFSC 3168	x	x	x	IM28	H30	Governador Celso Ramos/SC	Ilha do Arvoredo	-48.3639	-27.2906	OP270148	OP270091/OP270091	OP185411/OP185412	OP185457/OP185464
UCS4	CHUFSC 3169	CHUFSC 3169	x	x	x	IM29	H30	Governador Celso Ramos/SC	Ilha do Arvoredo	-48.3639	-27.2906	OP270148	OP270091/OP270091	OP185411/OP185412	OP185457/OP185457
UCS4	CHUFSC 3170	CHUFSC 3170	x	x	x	IM30	H30	Governador Celso Ramos/SC	Ilha do Arvoredo	-48.3639	-27.2906	OP270148	OP270091/OP270091	OP185411/OP185412	OP185457/OP185457
Ischnocnema manezinho	UFMG 18674	UFMG-T 7236	x	x	x	IM31	H15	Florianópolis/SC	UCAD	-48.4963	-27.5365	OP270134	OP270089/OP270089	OP185395/OP185396	OP185449/OP185450
Ischnocnema manezinho	UFMG 18675	UFMG-T 7237	x	x	x	IM32	H23	Florianópolis/SC	UCAD	-48.4963	-27.5365	OP270138	OP270089/OP270089	OP185395/OP185396	OP185465/OP185450
UCS2	CZFURB 22108	CZFURB 22108	x			IM33	H10	Corupá/SC	RPPN Emílio Battistella	-49.3455	-26.403	OP270152	OP270095/OP270095	OP185397/OP185398	OP185454/OP185454
UCS2	CZFURB 23158	CZFURB 23158	x	x		IM35	H10	São Bento do Sul/SC	CEPA Rugendas	-49.3071	-26.3196	OP270152	OP270097/OP270101	OP185413/OP185414	OP185454/OP185454
UCS2	CZFURB 23187	CZFURB 23187	x	x		IM36	H10	Timbó/SC	Morro Azul	-49.2178	-26.7691	OP270152	OP270090/OP270090	OP185397/OP185398	OP185453/OP185454
UCS2	CFBH 3158	CFBHT 3237	x	x		IM37	H10	São Bento do Sul/SC	Estrada Saraiva	-49.3547	-26.2944	OP270130	OP270102/OP270095	OP185397/OP185397	OP185454/OP185454
Ischnocnema sambaqui	DZSJRP 13353	CFBHT 11179	x			IM38	H25	São José dos Pinhais/PR	Serro e Gemido	-49.0681	-25.5576	OP270144	OP270103/OP270103	OP185415/OP185416	OP185466/OP185467
Ischnocnema sambaqui	-	CFBHT 18340	x			IM39	H26	São José dos Pinhais/PR	Serro e Gemido	-49.0681	-25.5576	OP270143	OP270103/OP270103	OP185415/OP185416	OP185468/OP185469
UCS3	CFBH 39259	CFBHT 19697	x	x		IM40	H27	Jaraguá do Sul/SC	Morro da Antena	-49.0546	-26.5172	OP270145	OP270104/OP270104	OP185417/OP185418	OP185470/OP185471
UCS3	CFBH 39260	CFBHT 19698	x	x		IM41	H27	Jaraguá do Sul/SC	Morro da Antena	-49.0546	-26.5172	OP270153	OP270104/OP270104	OP185419/OP185420	OP185470/OP185470
UCS3	CFBH 39269	CFBHT 19707	x	x		IM42	H27	Jaraguá do Sul/SC	Morro da Antena	-49.0546	-26.5172	OP270153	OP270104/OP270104	OP185417/OP185418	OP185470/OP185471
UCS3	CFBH 39270	CFBHT 19708	x	x		IM43	H27	Jaraguá do Sul/SC	Morro da Antena	-49.0546	-26.5172	OP270153	OP270104/OP270104	OP185418/OP185421	OP185471/OP185471
UCS2	CFBH 39290	CFBHT 19755	x			IM44	H1	São Francisco do Sul/SC	CEPA Vila da Glória	-48.6862	-26.2243	OP270154	OP270090/OP270090	OP185422/OP185423	OP185473/OP185472
UCS4	MNRJ 72226	MNRJ 72226	x	x		IM45	H28	Águas Mornas/SC	Gruta São Francisco	-48.9776	-27.8057	OP270146	OP270093/OP270105	OP185401/OP185402	OP185457/OP185457
UCS4	MNRJ 72227	MNRJ 72227	x			IM46	H28	Águas Mornas/SC	Gruta São Francisco	-48.9776	-27.8057	OP270146	OP270091/OP270091	OP185401/OP185402	OP185457/OP185457
Ischnocnema henselii	CHUFSC 3267	CHUFSC 3267	x			IM48	-	Guaramirim/SC	SC-108	-48.9789	-26.4428	OP270120	OP270106/OP270107	OP185424/OP185425	OP185474/OP185475
Ischnocnema henselii	CHUFSC 3269	CHUFSC 3269	x			IM50	-	Guaramirim/SC	SC-108	-48.9789	-26.4428	OP270120	OP270108/OP270108	OP185426/OP185427	OP185476/OP185476
UCS5	CHSA 344	CHSA 344	x	x		IM51	H31	São Bonifácio/SC	Morro das Pedras	-48.8947	-27.8198	OP270149	OP270109/OP270110	OP185428/OP185429	OP185477/OP185478
UCS5	CHSA 345	CHSA 345	x	x		IM52	H31	São Bonifácio/SC	Morro das Pedras	-48.8947	-27.8198	OP270149	OP270109/OP270111	OP185430/OP185431	OP185479/OP185479
UCS5	CHSA 346	CHSA 346	x	x		IM53	H31	São Bonifácio/SC	Morro das Pedras	-48.8947	-27.8198	OP270149	OP270111/OP270111	OP185432/OP185433	OP185480/OP185481
UCS1	CHUFSC 3442	CHUFSC 3442	x			IM55	H13	Florianópolis/SC	Lagoa do Peri	-48.5294	-27.7487	OP270132	OP270099/OP270099	OP185408/OP185409	OP185461/OP185461
Ischnocnema manezinho	CHUFSC 3445	CHUFSC 3445	x	x	x	IM56	H19	Florianópolis/SC	Ponta do Gravatá	-48.4411	-27.6169	OP270137	OP270089/OP270088	OP185395/OP185434	OP185465/OP185465
Ischnocnema manezinho	UFMG 19184	UFMG-T 7244	x	x	x	IM57	H17	Florianópolis/SC	Ponta do Gravatá	-48.4411	-27.6169	OP270135	OP270123/OP270088	OP185395/OP185396	OP185465/OP185465
Ischnocnema manezinho	UFMG 19185	UFMG-T 7245	x	x	x	IM58	H16	Florianópolis/SC	Ponta do Gravatá	-48.4411	-27.6169	OP270157	OP270113/OP270089	OP185435/OP185436	OP185465/OP185465
Ischnocnema manezinho	CHUFSC 3446	CHUFSC 3446	x	x	x	IM59	H7	Jaraguá do Sul/SC	Morro da Antena	-49.0597	-26.518	OP270125	OP270090/OP270090	OP185397/OP185398	OP185453/OP185454
Ischnocnema manezinho	CHUFSC 3447	CHUFSC 3447	x	x	x	IM60	H9	Jaraguá do Sul/SC	Morro da Antena	-49.0597	-26.518	OP270127	OP270090/OP270090	OP185437/OP185438	OP185454/OP185454
Ischnocnema manezinho	UFMG 19187	UFMG-T 7246	x	x	x	IM61	-	Jaraguá do Sul/SC	Morro da Antena	-49.0597	-26.518	-	OP270090/OP270090	OP185439/OP185440	OP185454/OP185454
Ischnocnema manezinho	UFMG 19188	UFMG-T 7247	x			IM62	H22	Florianópolis/SC	Praia Brava	-48.4136	-27.3904	OP270139	OP270114/OP270114	OP185441/OP185442	OP185462/OP185462
Ischnocnema manezinho	CHUFSC 3448	CHUFSC 3448	x	x	x	IM63	H18	Florianópolis/SC	Praia Brava	-48.4136	-27.3904	OP270136	OP270089/OP270089	OP185395/OP185396	OP185462/OP185462
Ischnocnema manezinho	UFMG 19189	UFMG-T 7248	x	x	x	IM64	H22	Florianópolis/SC	Praia Brava	-48.4136	-27.3904	OP270140	OP270088/OP270114	OP185394/OP185394	OP185448/OP185462
UCS2	UFMG 19190	UFMG-T 7249	x	x		IM65	H8	Joinville/SC	Morro do Itinga	-48.8324	-26.2629	OP270126	OP270095/OP270095	OP185397/OP185397	OP185454/OP185454
UCS2	UFMG 19191	UFMG-T 7250	x	x		IM66	H4	São Francisco do Sul/SC	CEPA Vila da Glória	-48.6862	-26.2243	OP270122	OP270115/OP270090	OP185422/OP185443	OP185456/OP185482
UCS2	UFMG 19192	UFMG-T 7251	x	x		IM67	H3	São Francisco do Sul/SC	CEPA Vila da Glória	-48.6862	-26.2243	OP270121	OP270090/OP270090	OP185439/OP185444	OP185483/OP185484
UCS2	CHUFSC 3449	CHUFSC 3449	x	x		IM68	H6	São Francisco do Sul/SC	CEPA Vila da Glória	-48.6862	-26.2243	OP270124	OP270090/OP270090	OP185439/OP185445	OP185453/OP185454
UCS2	UFMG 19193	UFMG-T 7252	x	x	x	IM69	H2	São Francisco do Sul/SC	Morro do Cantagalo	-48.7297	-26.1878	OP270156	OP270090/OP270090	OP185422/OP185400	-
Ischnocnema sambaqui	UFMG 19194	UFMG-T 7253	x			IM70	H24	São Francisco do Sul/SC	Morro do Cantagalo	-48.7297	-26.1878	OP270155	OP270116/OP270116	OP185446/OP185447	OP185466/OP185466
UCS5	CHUFSC 3437	CHUFSC 3437	x	x		IM71	H32	Governador Celso Ramos/SC	Palmas	-48.5583	-27.3337	OP270151	OP270117/OP270117	-	-
UCS5	CHUFSC 3438	CHUFSC 3438	x			IM72	H33	Governador Celso Ramos/SC	Palmas	-48.5583	-27.3337	OP270150	OP270118/OP270118	-	OP185485/OP185485
UCS5	CHUFSC 3439	CHUFSC 3439	x			IM73	-	Governador Celso Ramos/SC	Palmas	-48.5583	-27.3337	-	OP270119/OP270119	-	-
Ischnocnema manezinho	CFBH 2979	-		x		-	-	Florianópolis/SC	Poção*	-48.5051	-27.6145	-	-	-	-
UCS2**	CFBH 3157	-		x		-	-	Corupá/SC	RPPN Emílio Battistella*	-49.3455	-26.403	-	-	-	-
Ischnocnema manezinho	CHUFSC 2580	-		x		-	-	Florianópolis/SC	Poção*	-48.5051	-27.6145	-	-	-	-
Ischnocnema manezinho	CHUFSC 2944	-		x		-	-	Florianópolis/SC	Poção*	-48.5051	-27.6145	-	-	-	-
Ischnocnema manezinho	CHUFSC 2949	-		x		-	-	Florianópolis/SC	UCAD*	-48.4963	-27.5365	-	-	-	-
Ischnocnema manezinho	CHUFSC 3039	-		x		-	-	Florianópolis/SC	Poção*	-48.5051	-27.6145	-	-	-	-
UCS4**	CHUFSC 3171	-		x	x	-	-	Governador Celso Ramos/SC	Ilha do Arvoredo*	-48.3639	-27.2906	-	-	-	-
UCS4**	CHUFSC 3172	-		x		-	-	Governador Celso Ramos/SC	Ilha do Arvoredo*	-48.3639	-27.2906	-	-	-	-
UCS4**	CHUFSC 3174	-		x		-	-	Governador Celso Ramos/SC	Ilha do Arvoredo*	-48.3639	-27.2906	-	-	-	-
UCS4**	CHUFSC 3175	-		x		-	-	Governador Celso Ramos/SC	Ilha do Arvoredo*	-48.3639	-27.2906	-	-	-	-
UCS4**	CHUFSC 3443	-		x	x	-	-	São Bonifácio/SC	Gruta São José*	-48.9648	-27.8308	-	-	-	-
UCS4**	CHUFSC 3444	-		x	x	-	-	São Bonifácio/SC	Gruta São José*	-48.9648	-27.8308	-	-	-	-
UCS4**	CZFURB 03459	-		x		-	-	Blumenau/SC	Parque das Nascentes*	-49.0835	-27.0566	-	-	-	-
UCS2**	CZFURB 22109	-		x		-	-	Corupá/SC	RPPN Emílio Battistella*	-49.3455	-26.403	-	-	-	-
UCS2**	CZFURB 22748	-		x		-	-	Joinville/SC	APA Serra Dona Francisca*	-49.0466	-26.2259	-	-	-	-
UCS2**	CZFURB 22758	-		x		-	-	Joinville/SC	APA Serra Dona Francisca*	-49.0466	-26.2259	-	-	-	-
UCS2**	CZFURB 22929	-		x		-	-	Joinville/SC	APA Serra Dona Francisca*	-49.0466	-26.2259	-	-	-	-
Ischnocnema manezinho	MCP-A 1686	-		x		-	-	Florianópolis/SC	APA Serra Dona Francisca*	-49.0466	-26.2259	-	-	-	-
Ischnocnema manezinho	MCP-A 1687	-		x		-	-	Florianópolis/SC	Poção*	-48.5051	-27.6145	-	-	-	-
Ischnocnema manezinho	MCP-A 1688	-		x		-	-	Florianópolis/SC	Poção*	-48.5051	-27.6145	-	-	-	-
Ischnocnema manezinho	MCP-A 1689	-		x		-	-	Florianópolis/SC	Poção*	-48.5051	-27.6145	-	-	-	-
Ischnocnema manezinho	MCP-A 1690	-		x		-	-	Florianópolis/SC	Poção*	-48.5051	-27.6145	-	-	-	-
Ischnocnema manezinho	MCP-A 1691	-		x		-	-	Florianópolis/SC	Poção*	-48.5051	-27.6145	-	-	-	-
Ischnocnema manezinho	MCP-A 1692	-		x		-	-	Florianópolis/SC	Poção*	-48.5051	-27.6145	-	-	-	-
Ischnocnema manezinho	MCP-A 1693	-		x		-	-	Florianópolis/SC	Poção*	-48.5051	-27.6145	-	-	-	-
Ischnocnema manezinho	MCP-A 1694	-		x		-	-	Florianópolis/SC	Poção*	-48.5051	-27.6145	-	-	-	-
Ischnocnema manezinho	MCP-A 1695	-		x		-	-	Florianópolis/SC	Poção*	-48.5051	-27.6145	-	-	-	-
Ischnocnema manezinho	MCP-A 6364	-		x		-	-	Florianópolis/SC	UCAD	-48.5167	-27.5833	-	-	-	-
Ischnocnema manezinho	MCP-A 6365	-		x		-	-	Florianópolis/SC	UCAD*	-48.4963	-27.5365	-	-	-	-
Ischnocnema manezinho	MCP-A 6366	-		x		-	-	Florianópolis/SC	UCAD*	-48.4963	-27.5365	-	-	-	-
Ischnocnema manezinho	MCP-A 6367	-		x		-	-	Florianópolis/SC	UCAD*	-48.4963	-27.5365	-	-	-	-
Ischnocnema manezinho	MCP-A 6425	-		x		-	-	Florianópolis/SC	Poção*	-48.5051	-27.6145	-	-	-	-
Ischnocnema manezinho	MCP-A 6426	-		x		-	-	Florianópolis/SC	Poção*	-48.5051	-27.6145	-	-	-	-
Ischnocnema manezinho	MCP-A 6429	-		x		-	-	Florianópolis/SC	Poção*	-48.5051	-27.6145	-	-	-	-
Ischnocnema manezinho	MCP-A 6442	-		x		-	-	Florianópolis/SC	Poção*	-48.5051	-27.6145	-	-	-	-
Ischnocnema manezinho	MCP-A 7647	-		x		-	-	Florianópolis/SC	UCAD	-48.5167	-27.5833	-	-	-	-
Ischnocnema manezinho	MCP-A 7648	-		x		-	-	Florianópolis/SC	UCAD	-48.5167	-27.5833	-	-	-	-
UCS1**	MCP-A 8231	-		x		-	-	Florianópolis/SC	Lagoa do Peri*	-48.5294	-27.7487	-	-	-	-
UCS1**	MCP-A 8232	-		x		-	-	Florianópolis/SC	Lagoa do Peri*	-48.5294	-27.7487	-	-	-	-
Ischnocnema manezinho	MCP-A 8280	-		x		-	-	Florianópolis/SC	Poção*	-48.5051	-27.6145	-	-	-	-
Ischnocnema manezinho	MNRJ 72223	-		x		-	-	Florianópolis/SC	Poção*	-48.5051	-27.6145	-	-	-	-
Ischnocnema manezinho	MNRJ 17479	-		x		-	-	Florianópolis/SC	Poção*	-48.5051	-27.6145	-	-	-	-
UCS4**	UFMG 00082	-		x		-	-	Blumenau/SC	Fazenda Santa Rita*	-49.1588	-27.1074	-	-	-	-
UCS4**	UFMG 00083	-		x		-	-	Blumenau/SC	Fazenda Santa Rita*	-49.1588	-27.1074	-	-	-	-
UCS4**	UFMG 00084	-		x		-	-	Governador Celso Ramos/SC	Ilha do Arvoredo*	-48.3639	-27.2906	-	-	-	-
UCS4**	UFMG 00085	-		x		-	-	Governador Celso Ramos/SC	Ilha do Arvoredo*	-48.3639	-27.2906	-	-	-	-
UCS4**	UFMG 00086	-		x		-	-	Governador Celso Ramos/SC	Ilha do Arvoredo*	-48.3639	-27.2906	-	-	-	-
UCS4**	UFMG 07079	-		x		-	-	São Bonifácio/SC	Gruta São José*	-48.9648	-27.8308	-	-	-	-
UCS4**	UFMG 07098	-		x		-	-	São Bonifácio/SC	Gruta São José*	-48.9648	-27.8308	-	-	-	-
UCS4**	UFMG 07654	-		x		-	-	Blumenau/SC	Parque Nacional da Serra do Itajaí*	-49.1321	-27.0777	-	-	-	-
UCS2**	UFMG 14452	-		x		-	-	Corupá/SC	RPPN Emílio Battistella*	-49.3455	-26.403	-	-	-	-
UCS2**	UFMG 16353	-		x		-	-	Corupá/SC	Morro do Boi*	-49.2258	-26.4229	-	-	-	-
UCS4**	UFMG 17513	-		x		-	-	Governador Celso Ramos/SC	Ilha do Arvoredo*	-48.3639	-27.2906	-	-	-	-
UCS4**	UFMG 17514	-		x		-	-	Governador Celso Ramos/SC	Ilha do Arvoredo*	-48.3639	-27.2906	-	-	-	-
UCS4**	UFMG 18682	-		x	x	-	-	São Bonifácio/SC	Gruta São José*	-48.9648	-27.8308	-	-	-	-
UCS2**	UFMG 21599	-		x		-	-	Corupá/SC	RPPN Emílio Battistella*	-49.3455	-26.403	-	-	-	-
UCS2**	UFMG 21600	-		x		-	-	Corupá/SC	RPPN Emílio Battistella*	-49.3455	-26.403	-	-	-	-
UCS3**	Jaragua1 (w/ voucher)	-		-	x	-	-	Jaraguá do Sul/SC	Morro da Antena*	-49.0546	-26.5172	-	-	-	-
UCS5**	SaoBonifacio1 (w/ voucher)	-		-	x	-	-	São Bonifácio/SC	Morro das Pedras	-48.8947	-27.8198	-	-	-	-
UCS5**	SaoBonifacio2 (w/ voucher)	-		-	x	-	-	São Bonifácio/SC	Morro das Pedras	-48.8947	-27.8198	-	-	-	-
Ceuthomantis smaragdinus	-	-	-	-	-	-	-	-	-	-	-	GQ345207	-	-	GQ345191
Eleutherodactylus coqui	-	-	-	-	-	-	-	-	-	-	-	EF637018	-	-	EF107500
Brachycephalus eppiphium	-	-	-	-	-	-	-	-	-	-	-	GQ345195	-	-	GQ345180
Craugastor podiciferus	-	-	-	-	-	-	-	-	-	-	-	GQ345197	-	-	GQ345182
Pristimantis thymelensis	-	-	-	-	-	-	-	-	-	-	-	JX564889	-	-	KX200450
Phrynopus bracki	-	-	-	-	-	-	-	-	-	-	-	GQ345202	-	-	GQ345186

## Sheet: Table S2
Table S2 - Selected fragments with their respective primers, sequences, annealing temperatures and times, and original work
Gene fragment	Primer	Sequence	Annealing temperature (°C)	Anneling time (s)	Reference
Cytochrome B (Cyt-b)	MVZ15	GAACTAATGGCCCACACWWTACGNAA>	58	40	Moritz et al., 1992
	ARH	TAWAAGGGTCTTCTACTGGTTG<			Goebel et al., 1999
Fibrinogen A alpha-polypeptide, intron 1 (α-fib)	MVZ47	AGTGAAAGATACAGTCACAGTGCTAGG>	58	60	Bell et al., 2011
	MVZ48	GGAGGATATCAGCACAGTCTAAAAAG<
Beta-fibrinogen, intron 7 (β-fib)	BFXF	CAGYACTTTYGAY1GAGACAAYGATGG>	62	60	Sequeira et al., 2006
	BFXR	TTGTACCACCAKCCACCACCRTCTTC<
Chemokine Receptor 4 (cxc)	CXCF1	TCCAGAACCATGACTGATAAGTA>	56	60	Castroviejo-Fisher et al., 2015
	CXCR1	CAAGGCTTCTGTGATGGAGATCC<

## Sheet: Table S3
Table S3 - Morphometric measurements of males of Ischnocnema manezinho. The definition and reference of each measure are available in the metadata table. *UCS defined according to same municipality samples collected, without genetic analysis.
Voucher ID	Genetic Lineage	SVL	HL	HW	ED	TD	EN	NS	IND	UEW	AMD	IOD	FLL	FAW	HAL	Fin4DW	THL	TL	TSL	FL	Toe4DW
CHUFSC 2949	Ischnocnema manezinho*	30.03	11.29	10.23	3.94	2.06	3.61	2.01	2.85	2.54	4.84	3.45	7.16	1.65	8.89	0.98	14.39	16.68	9.34	13.91	0.71
CHUFSC 3018	UCS1	27.15	10.26	9.11	2.97	1.69	3.08	1.77	2.13	2.04	4.24	3.28	6.88	1.41	7.43	1	13.72	15.44	8.9	12.51	0.76
CHUFSC 3039	Ischnocnema manezinho*	25.87	9.23	7.72	3.49	1.55	3.43	1.74	2.08	2.88	4.23	3.21	5.95	1.39	8.27	0.99	13.42	14.44	7.98	12.92	0.69
CHUFSC 2580	Ischnocnema manezinho*	24.67	9.06	7.85	3.44	1.56	2.8	1.38	2.09	2.52	3.79	2.66	5.96	1.27	7.47	0.9	12.3	14.08	7.87	12.47	0.7
CHUFSC 2944	Ischnocnema manezinho*	24.12	9.24	8.08	3.57	1.57	3.03	1.43	2.15	2.03	4.27	3.1	5.92	1.32	7.38	0.94	12.11	13.25	7.38	11.44	0.77
MCP-A 6442	Ischnocnema manezinho*	25.17	8.52	9.22	3.77	1.27	3.14	1.64	2.3	2.41	5.05	2.67	6.24	1.72	8.02	1.38	13.36	14.76	8.34	13.75	1.11
MCP-A 6365	Ischnocnema manezinho*	27.45	11.32	10.18	3.76	1.27	3.54	1.38	2.35	2.84	5.07	3.12	7.02	1.6	7.91	1.32	13.55	15.09	9.11	15.08	1.09
MCP-A 6366	Ischnocnema manezinho*	27.84	10.51	10.53	3.41	1.34	3.4	1.59	2.52	2.63	5.05	2.63	6.88	1.4	8.78	1.41	15.14	15.21	8.71	14.39	1.15
MCP-A 6425	Ischnocnema manezinho*	25.89	10.23	9.2	3.31	1.45	3.17	1.55	2.5	2.67	4.54	2.8	6.93	1.39	7.95	1.35	14.29	15.2	8.5	12.5	1.08
MCP-A 8231	UCS1*	24.45	10.07	8.87	3.11	1.39	3.27	1.44	2.14	2.22	4.22	2.76	5.87	1.13	7.84	0.99	12.94	14.92	8.08	13.29	0.8
MCP-A 8232	UCS1*	23.73	9.96	8.67	3.17	1.45	3.07	1.48	2.06	2.35	3.88	2.67	5.68	1.11	7.6	1.3	14.01	14.66	7.93	13	1.05
MCP-A 6364	Ischnocnema manezinho*	24.86	10.19	8.87	3.39	1.64	3.06	1.32	2.47	2.81	4.23	2.83	6.56	1	8.46	1.49	13.46	14.74	8.14	13.36	1.18
MCP-A 6367	Ischnocnema manezinho*	24.9	9.26	7.94	3.82	1.68	3.36	1.28	1.93	2.45	4.35	2.22	6.48	1.21	7.97	1.32	13.33	15.23	8.54	14.1	1.17
MCP-A 7648	Ischnocnema manezinho*	25.47	9.6	8.8	2.5	1.73	3.05	1.44	2.1	2.6	3.53	2.66	6.47	1.28	8.47	1.29	14.41	14.86	8.23	13.78	1.06
MCP-A 6429	Ischnocnema manezinho*	24.87	9.67	8.1	3.11	1.53	3.18	1.1	1.96	2.19	3.65	2.76	6.1	1.26	7.68	1.49	13.32	14.27	8	13.43	1.18
MCP-A 6426	Ischnocnema manezinho*	24.67	9	8.58	3.39	1.58	3.13	1.21	1.77	2.62	3.78	2.81	6.76	1.11	8.54	1.34	13.52	14.88	8.41	13.67	1.02
MCP-A 7647	Ischnocnema manezinho*	24.58	9.01	8.19	3.07	1.39	2.94	1.2	1.62	2.07	3	2.77	5.79	1.04	7.26	1.29	14.2	14.24	7.79	12.72	0.92
MCP-A 8280	Ischnocnema manezinho*	21.39	8.24	7.36	3.18	1.18	2.48	1.15	1.63	2.23	2.64	2.72	4.51	0.73	5.79	0.78	10.9	12.52	6.69	11.39	0.53
MCP-A 1686	Ischnocnema manezinho*	27.44	10.39	9.48	4.11	1.43	3.5	1.51	1.8	3.04	3.99	3.05	6.27	1.17	8.48	1.32	15.34	16.48	8.36	13.94	1.11
MCP-A 1692	Ischnocnema manezinho*	23.58	9.85	9.02	3.41	1.69	3.15	1.3	1.87	2.72	3.91	3.09	6.34	1.26	8.19	1.36	13.97	14.41	8.4	13.5	1.06
MCP-A 1687	Ischnocnema manezinho*	23.17	9.47	8.5	3.6	1.55	2.94	1.21	1.38	2.21	3.38	2.47	5.94	1.11	7.64	0.93	14.05	14.66	8.29	13.61	0.71
MCP-A 1691	Ischnocnema manezinho*	25.62	9.78	9.31	3.48	1.37	2.83	1.12	1.58	2.84	3.91	3.04	6.74	1.43	8.16	1.26	13.74	13.88	7.86	14	1.12
MCP-A 1694	Ischnocnema manezinho*	24.62	9.63	9	3.61	1.53	2.3	1.16	1.53	2.68	3.61	2.69	7.43	1.26	8.55	1.19	14.26	14.39	7.68	13.86	0.99
MCP-A 1688	Ischnocnema manezinho*	25.5	9.44	8.48	3.82	1.14	2.62	1.1	1.46	2.4	3.88	2.51	6.38	1.13	8.56	1.28	13.86	14.24	8.07	13.64	1.04
MCP-A 1689	Ischnocnema manezinho*	24.04	9.78	8.47	3.48	1.53	2.92	1.11	1.48	2.62	3.67	2.61	6.32	1.06	7.88	1.25	11.76	14.02	7.71	13.26	0.93
MCP-A 1693	Ischnocnema manezinho*	21.97	9.03	8.26	3.1	1.47	2.88	0.92	1.44	2.15	3.42	2.34	5.88	1.01	7.18	1.12	12.85	13.69	7.31	12.1	0.88
MCP-A 1690	Ischnocnema manezinho*	21.8	8.28	7.85	2.92	1.39	2.44	0.94	1.26	1.81	3.12	2.04	4.95	0.88	6.6	0.99	12.27	12.18	6.87	10.97	0.76
MCP-A 1695	Ischnocnema manezinho*	27.16	9.8	9.68	3.61	1.37	2.93	1.13	1.41	2.48	3.61	2.86	6.48	1.23	8.32	1.08	14.9	15.29	8.75	14.65	0.95
CFBH 2979	Ischnocnema manezinho*	24.94	9.59	8.75	3.32	1.51	2.96	1.45	2.03	2.51	4.51	2.42	5.42	1.13	7.74	1.43	13.18	14.34	7.72	13.49	1.18
UFMG 18677	Ischnocnema manezinho	26.76	9.93	9.51	3.53	1.6	2.95	1.66	2.12	2.6	4.33	2.76	6.65	1.08	8.32	1.33	14.05	15.04	9.02	14.1	1.02
UFMG 18678	Ischnocnema manezinho	23.61	8.74	7.83	2.99	1.36	2.79	1.19	2.02	2.42	4.09	2.58	6.59	1.02	6.21	1.15	13.42	14.03	7.79	14.38	0.97
UFMG 18675	Ischnocnema manezinho	21.23	8.35	7.62	2.65	1.29	2.54	1.2	1.92	2.12	3.86	2.4	6.31	0.97	7.35	1.1	12.68	12.93	7.41	12.68	0.97
UFMG 18676	Ischnocnema manezinho	25.91	9.97	9.24	2.79	1.58	2.98	1.17	1.59	2.67	4.23	2.7	6.25	1.17	7.84	1.61	14.26	15.11	8.35	14.12	1.17
UFMG 18674	Ischnocnema manezinho	27.69	11.66	9.96	3.86	1.41	3.55	1.59	1.84	3.22	4.32	3.16	6.7	1.25	9.01	1.69	14.42	15.79	8.87	14.49	1.42
UFMG 18673	Ischnocnema manezinho	25.84	10.34	9.27	3.32	1.39	2.85	1.33	1.94	2.85	4.19	2.95	6.26	1.09	8.69	1.31	13.8	14.2	8.13	13.18	1.01
MNRJ 72223	Ischnocnema manezinho*	23.42	9.97	8.98	3.11	1.51	2.66	1.03	2.02	2.55	4.59	2.41	5.93	1.47	7.63	1.13	14.03	14.55	8.54	13.95	0.78
MNRJ 17479	Ischnocnema manezinho*	22.93	8.97	8.22	3.08	1.43	2.33	1.11	1.93	2.36	4.34	2.94	4.83	1.07	7.82	1.15	13.06	13.34	7.76	12.43	0.84
CHUFSC 2958	Ischnocnema manezinho	26.94	10.26	9.28	3.84	1.62	3.15	1.73	2.17	2.67	4.43	2.78	6	1.38	8.25	1.08	12.31	13.99	8.13	12.69	0.8
UFMG 17514	UCS4*	29.89	12.01	11.2	3.89	1.79	3.65	1.84	2.51	2.6	5.04	4.18	8.54	1.83	10.3	1.21	17.03	18.04	9.95	16.64	0.77
UFMG 17513	UCS4*	29.24	11.62	10.77	3.74	1.86	3.62	1.52	2.32	2.73	5.07	3.34	7.78	1.56	10.95	1.27	16.88	18.21	10.01	16.8	1
CHUFSC 3175	UCS4*	28.86	10.87	10	2.76	1.79	3.44	0.76	1.93	3.05	4.47	3.39	7.53	0.96	9.46	0.98	15.29	17.27	9.91	16.05	0.81
CHUFSC 3172	UCS4*	33.03	12.51	11.27	3.89	1.92	4.26	1.56	1.92	3.41	5.82	4.64	7.96	1.19	10.54	1.17	18.29	18.76	10.89	17.26	0.94
CHUFSC 3165	UCS4	33.54	13.11	11.49	4.51	1.78	4.28	1.47	2.3	3.08	5.63	3.89	7.73	1.33	10.16	1.35	17.46	18.1	10.37	17.83	1.14
CHUFSC 3168	UCS4	34.51	12.92	12.41	4.22	2.03	3.78	1.39	2.07	3.42	6.59	3.32	7.94	1.22	10.67	1.36	17.95	18.48	10.18	17.62	1.12
CHUFSC 3169	UCS4	31.83	11.25	9.79	4.13	1.92	3.84	1.34	2.09	2.77	5.14	3.6	7.64	1.35	9.55	1.04	15.03	18.05	10.06	17.48	0.96
CHUFSC 3171	UCS4*	34.31	12.61	12.13	3.64	1.89	4.07	1.29	2.1	2.95	5.33	3.82	8.02	1.39	10.27	1.06	16.76	17.27	10.34	17.14	0.97
CHUFSC 3174	UCS4*	33.18	13.11	12.52	4.32	1.73	3.84	1.4	2.17	3.25	5.56	3.18	7.43	1.34	10.68	1.11	12.97	18.15	9.93	17.07	0.91
CHUFSC 3162	UCS4	33.72	12.83	11.92	3.58	1.97	4.15	1.34	2.07	3.15	5.48	4.22	9.06	1.27	10.24	1.15	18.1	18.5	10.47	17.99	1.06
CHUFSC 3170	UCS4	35.06	13.07	12.36	4.48	2.07	4.04	1.99	2.63	3.48	6.14	3.96	8.01	1.38	10.19	1.1	17.54	17.86	10.17	16.95	0.98
CHUFSC 3164	UCS4	26.87	10.33	9.58	2.97	1.49	2.65	1.3	1.61	2.22	4.25	2.76	6.57	1.11	8.24	1.19	13.77	14.53	9.13	13.91	0.93
CHUFSC 3167	UCS4	31.8	11.99	11.43	3.96	1.69	3.4	1.14	2.34	3.36	5.04	3.89	7.46	1.46	9.03	1.06	16.91	17.72	9.6	15.13	0.87
CHUFSC 3163	UCS4	33.66	13	12.26	4.27	2.21	3.44	1.67	2.79	3.32	5.94	3.92	7.71	1.21	11.15	1.35	18.15	18.3	10.47	17.63	1.05
UFMG 84	UCS4*	33.42	12.42	11.63	3.96	1.9	4.05	1.54	2.59	2.65	5.07	4.47	8.04	1.14	10.08	1.41	16.31	17.76	10.62	15.91	0.81
UFMG 86	UCS4*	34.46	13.91	11.95	3.93	1.98	3.83	1.57	2.47	2.87	5.69	3.63	9.39	1.53	10.18	1.22	11.99	18.46	11.17	17.58	0.99
UFMG 85	UCS4*	33.38	12.87	11.79	4.41	1.94	4.2	1.53	2.25	2.95	5.45	3.34	9.13	1.4	8.66	1.43	16.65	18.97	10.91	17.43	1.27
UFMG 83	UCS4*	26.39	10.3	9.23	3.29	1.7	3.53	1.38	1.46	2.57	4.8	2.87	6.78	1.46	8.78	1.31	14.35	15.6	8.36	15.34	1.09
UFMG 82	UCS4*	24.04	9.02	7.76	2.64	1.25	2.71	1.16	1.64	2.03	3.81	2.79	6.63	1.2	8.62	1.22	13.76	15.23	8.53	14.51	1.04
UFMG 9974	UCS2	21.88	8.34	6.7	3.17	1.42	2.71	1.8	1.94	2.18	3.38	2.21	4.95	1.11	7.04	0.95	12.03	12.62	6.93	11.21	0.77
UFMG 16353	UCS2*	20.38	7.72	6.77	2.9	1.17	2.2	1.19	1.13	1.96	3.45	2.21	5.24	1.05	7.75	0.97	11.76	12.55	6.91	11.95	0.83
UFMG 14452	UCS2*	20.06	7.14	6.71	2.75	1.06	2.18	0.97	1.52	1.99	3.82	2.22	4.68	0.87	6.87	0.91	11.2	12.18	6.76	11.41	0.76
CFBH 3158	UCS2	24.22	9.25	7.79	3.03	1.43	2.65	1.14	2.06	2.27	4.03	2.72	5.87	1.21	7.83	1.36	14.06	14.61	8.08	12.68	1.07
CFBH 3157	UCS2*	21.37	8.35	7.23	2.77	1.28	2.23	1.29	1.66	2.22	3.57	2.55	5.2	1.14	7.24	1.29	12.34	13.12	7.18	11.48	1.05
UFMG 7653	UCS4	27.62	10.02	8.69	3.38	1.41	2.93	1.42	1.91	2.49	4.42	2.85	6.38	1.01	8.48	1.42	14.24	15.62	8.48	15.11	1.18
UFMG 7654	UCS4*	24.92	9.26	8.15	2.84	1.26	2.69	1.73	1.66	2.53	4.31	2.7	6.58	0.93	8.79	1.22	14.3	15.05	7.95	14.31	1.03
UFMG 18679	UCS2	20.13	7.49	6.65	2.62	1.05	2.11	0.89	1.53	1.93	3.35	2.42	4.99	0.89	6.51	0.78	11.69	12.1	6.47	10.87	0.63
UFMG 18680	UCS2	20.64	7.84	6.89	2.65	1.27	2.26	0.86	1.48	1.89	3.39	2.52	5.06	0.85	6.98	1.12	12.29	12.67	6.83	12.29	0.88
UFMG 18681	UCS2	18.13	6.91	5.95	2.53	0.98	2.08	1.06	1.29	2.06	3.02	2.05	4.77	0.66	5.7	0.64	10.45	10.63	5.98	9.68	0.54
UFMG 18500	UCS2	21.43	8.24	7.19	3.01	1.22	2.34	1.28	1.85	2.54	3.86	2.43	5.84	0.86	7.39	1.19	11.8	12.99	7.3	12.46	0.98
UFMG 18518	UCS2	20.97	8.17	7.27	2.55	1.15	2.25	1.2	1.8	2.63	4.13	2.54	5.18	0.96	6.87	1.08	12.07	12.37	6.85	12.09	0.9
UFMG 21600	UCS2*	20.5	8.05	7.1	2.6	1.27	2.11	1.28	2.05	2.19	4.08	2.33	4.88	0.95	7.09	1.2	11.73	11.95	7.11	11.25	0.79
UFMG 21599	UCS2*	19.4	7.9	6.95	2.8	1.06	2.33	1.12	1.83	1.98	3.58	2.46	5.18	0.95	7.26	1.06	11.85	12.57	7.38	12.07	0.66
CZFURB 3459	UCS4*	23.35	9.23	7.69	2.97	1.46	2.8	1.32	1.79	2.59	4.31	2.06	6.71	1.28	8.37	1.1	13.03	13.91	8.22	13.72	1.01
CZFURB 23187	UCS2	21.08	7.55	7.31	2.96	1.41	2.28	1.31	2.03	2.09	3.45	2.37	5.19	0.98	7.06	1.09	12.87	12.56	7.06	12.87	0.79
CZFURB 23158	UCS2	20.91	8.36	7.76	2.97	1.4	2.43	1.39	2.31	2.19	4.11	2.41	5.15	1.29	7.25	1.12	12.59	12.3	7.19	12.69	0.82
CZFURB 22109	UCS2*	24.88	9.82	8.35	2.85	1.21	2.71	1.36	2.15	2.46	4.79	3.2	6.71	1.32	8.32	1.18	15.34	16	8.99	14.93	0.89
CZFURB 22929	UCS2*	20.9	8.01	7.15	2.8	1.62	2.25	1.12	1.86	2.28	4.07	1.99	6.2	1.09	7.1	1.17	11.83	12.35	7.21	12.21	0.94
CZFURB 22748	UCS2*	20.49	8.24	7.15	2.6	1.13	2.1	1.38	1.37	2.43	4.02	2.67	6.01	0.79	6.77	1.19	11.53	11.78	6.91	11.82	1.01
CZFURB 22758	UCS2*	20.51	7.72	7.2	2.39	1.73	2.36	1.11	1.68	2.31	4	2.05	4.99	0.86	6.71	1.18	11.31	11.7	7.06	11.39	0.99
CFBH 39270	UCS3	22.63	8.94	8.04	2.77	0.92	2.61	1.19	1.9	2.74	3.83	2.71	6.4	1.31	7.53	0.98	13.09	13.74	7.79	13.23	0.78
CFBH 39269	UCS3	24.2	8.67	8.46	3.46	1.25	3.28	1.51	1.72	3.09	4.41	3.1	6.81	1.38	8.97	0.86	15.19	16.29	9.03	15.35	0.81
CFBH 39260	UCS3	26.29	10.18	9.31	2.99	1.27	3.1	1.56	1.9	3.01	4.36	2.69	6.41	1.47	9.6	1.12	15.93	16.25	9.36	16.13	0.92
CFBH 39259	UCS3	26.06	9.98	8.29	3.38	1.36	3.17	1.32	1.71	2.27	4.21	3.29	6.7	1.21	8.86	0.92	15.12	16.87	9.33	14.99	0.78
UFMG 7079	UCS4*	23.13	8.49	8.2	3.28	1.48	2.99	1.22	1.43	2.96	3.77	2.86	6.42	1.16	8.9	1.08	13.76	14.79	8.62	14.45	1.01
UFMG 7098	UCS4*	25.89	10.13	8.9	3.29	1.22	3.13	1.32	1.44	2.61	4.36	2.89	6.48	1.26	8.13	1.17	14.51	15.47	8.49	14.44	0.88
UFMG 18682	UCS4*	26.7	9.75	8.49	3.09	1.49	3.34	1.07	1.71	2.49	4.08	2.75	6.72	1.11	8.73	1.12	15.7	15.88	9.12	14.8	0.92
UFMG 18510	UCS4	25.94	10.46	9.54	3.1	1.29	3.03	1.62	1.93	2.66	4.71	3.37	6.76	1.5	9.1	1.16	15.17	15.94	8.93	15.81	1.14
UFMG 18513	UCS4	28.68	10.93	10.25	3.11	1.48	3.13	1.65	2.1	3.02	4.54	3.71	8.28	1.62	9.51	1.42	16.36	17.02	9.6	16.29	1.25
MNRJ 72226	UCS4	24.57	9.8	8.68	2.95	1.53	2.75	1.23	1.84	2.54	4.62	2.44	6.54	1.09	8.01	1.08	13.75	14.57	8.09	13.48	0.81
CHSA 346	UCS5	22.45	9.08	7.88	2.87	1.28	2.51	1.23	2.32	2.29	4.07	2.81	4.86	0.89	7.27	0.91	12.81	13.43	7.72	12	0.85
CHSA 345	UCS5	20.74	8.27	7.83	2.73	1.21	2.19	1.09	2.12	2.43	3.82	2.26	5.06	1.21	6.57	0.85	12.69	12.49	6.84	11.44	0.78
CHSA 344	UCS5	20.24	8.17	7.58	2.92	1.54	2.31	1.22	2.06	2.26	3.68	2.66	6.08	0.94	7.06	0.86	12.21	13.01	7.11	11.95	0.78
UFMG 19189	Ischnocnema manezinho	24.17	10.13	10.08	3.64	1.63	3.11	0.81	2.17	2.78	4.89	2.73	6.09	1.04	7.99	1.19	14.42	15.42	8.68	13.76	1.03
UFMG 19184	Ischnocnema manezinho*	26.87	10.61	10.14	3.44	1.7	3.21	1.27	2.54	2.63	4.28	3.07	6.34	1.37	8.85	1.36	15.52	15.87	9.12	15.04	1.17
UFMG 19185	Ischnocnema manezinho*	26.44	10.67	9.83	3.34	1.41	3.06	1.32	2.24	2.71	4.68	2.69	5.82	1.33	8.7	1.35	14.73	15.06	8.38	14.9	1.2
CHUFSC 3448	Ischnocnema manezinho	23.99	9.49	8.93	2.9	1.41	2.81	1.02	2.18	2.36	4.33	2.3	5.94	1.16	7.59	1.28	13.21	14.48	8.05	12.1	1.1
CHUFSC 3445	Ischnocnema manezinho	23.53	9.28	8.96	3.01	1.23	2.67	1.28	2.21	2.28	4.18	2.46	6.02	1.25	7.77	1.38	13.59	13.92	8.18	11.42	1.14
UFMG 19190	UCS2	21.3	8.49	7.92	2.96	1.07	2.61	1.12	2.04	2.15	4.36	2.66	5.4	1.06	7.11	1.11	9.49	12.35	6.68	11.58	0.92
UFMG 19192	UCS2	20.88	8.21	7.4	3.39	1.31	2.47	1.1	2.14	2.08	3.71	2.25	4.61	1.05	6.44	1.11	10.53	11.89	6.64	10.86	0.85
UFMG 19191	UCS2	18.09	7.35	6.98	2.41	0.92	2.15	1.15	1.98	1.99	3.05	2.31	4.57	0.85	6.44	0.98	10.62	11.52	6.08	11.08	0.84
UFMG 19193	UCS2	20.47	8.45	7.54	2.77	1.32	2.19	1.15	2.09	2.04	3.42	2.2	5.3	0.75	6.9	1.11	11.65	12.33	7.5	11.91	0.92
CHUFSC 3437	UCS5	23.49	9.95	9.26	3.61	1.14	2.68	1.24	1.99	2.36	4.31	2.51	5.75	1.17	7.1	0.71	13.88	13.99	8.03	11.93	0.74
CHUFSC 3449	UCS2	21.14	8.18	7.66	2.84	1.4	2.57	1.06	1.83	2.36	3.67	2.42	5.76	1.01	6.44	1.2	11.98	12.92	7.41	11.67	0.98
UFMG 19187	UCS2	19.42	7.52	6.86	3.07	1.21	1.8	1.12	2.24	2.18	3.16	2.37	4.96	0.87	6.98	1.12	11.48	12.17	6.69	10.92	0.84
CHUFSC 3447	UCS2	20.06	7.59	7.3	2.63	1.24	2.22	1.18	2.04	2.08	3.77	2.27	5.14	1.13	6.67	1.18	11.3	11.88	6.85	11.53	0.94
CHUFSC 3446	UCS2	19.32	7.86	7.43	2.83	1.14	2.19	1.03	1.98	2.02	3.92	2.29	5.24	1.19	6.89	1.06	11.6	12.39	6.99	11.55	0.92
CHUFSC 3444	UCS4*	24.53	10.06	8.76	3.3	1.6	2.82	1.22	1.94	2.71	4.33	2.9	6.3	1.21	7.61	1.15	13.32	14.9	8.54	13.61	0.84
CHUFSC 3443	UCS4*	24.45	9.83	9.04	3.5	1.37	2.69	1.16	2.04	2.59	4.36	2.78	7.06	1.28	8.22	1.17	13.07	15.54	8.86	15.14	1.03

## Sheet: Table S4
Table S4 - Individual mean of different call parameters of males of Ischnocnema manezinho. *Lineages defined according to same municipality samples collected, without genetic analysis.
Voucher ID	Genetic Lineage	Number of calls	Call duration (s)	Dominant Frequence (Hz)	Low Frequence (Hz)	High Frequence (Hz)	Notes/call	Note rate (notes/call duration)
UFMG 18510	UCS4	4	0.48325	1242.35	3065.12	2024.12	4.75	9.875
UFMG 18513	UCS4	7	0.730857	1348.3	2914.5	2017.97	7.143	9.794
UFMG 18682	UCS4*	8	0.675	1471.46	2886.95	1981.05	6.375	9.96
CHUFSC 3443	UCS4*	7	0.476143	1469.66	2557.1	2042.59	4.143	8.866
CHUFSC 3444	UCS4*	3	0.583	1341.53	2651.43	1894.9	4.333	7.956
CHUFSC 3162	UCS4	16	0.5745	1219.2	2831.86	2045.67	6.131	11.12
CHUFSC 3163	UCS4	8	0.61	1138.81	2667.99	1873.39	6.375	10.524
CHUFSC 3164	UCS4	5	0.9048	1223.46	2408.46	2067.2	8.8	9.735
CHUFSC 3165	UCS4	36	0.706889	1098.98	2739.86	1827.93	7.556	10.857
CHUFSC 3167	UCS4	5	0.7044	1229.56	2967.46	1875	7.6	10.803
CHUFSC 3168	UCS4	5	0.345	1114.72	2380.14	1894.9	4.2	12.232
CHUFSC 3169	UCS4	8	0.721375	1189.25	2263.75	1894.9	8	11.19
CHUFSC 3170	UCS4	10	0.9094	1065.23	2673.61	1843.24	9.4	10.343
CHUFSC 3171	UCS4*	5	0.5054	1140.5	2270.18	1653.78	5.6	11.251
UFMG 18673	Ischnocnema manezinho	8	0.19125	1902.57	3689.71	2777.76	3.125	17.846
UFMG 18674	Ischnocnema manezinho	5	0.3782	1724.34	3991.8	2687.34	5.2	13.838
UFMG 18675	Ischnocnema manezinho	6	0.450667	2025.75	4002.82	2813.67	5.167	11.505
UFMG 18677	Ischnocnema manezinho	7	0.510429	1796.14	3724.13	2903.9	7.714	15.651
UFMG 18678	Ischnocnema manezinho	3	0.641	1941.6	3756.47	2813.63	9.333	14.569
UFMG 19184	Ischnocnema manezinho	13	0.521231	1877.15	3466.42	2570.71	7.571	13.316
UFMG 19185	Ischnocnema manezinho	5	0.7328	1990.52	3294.82	2859.58	9.4	12.838
UFMG 19189	Ischnocnema manezinho	2	0.3465	1736.7	3439.75	2670.1	5	14.594
CHUFSC 3445	Ischnocnema manezinho	3	0.463667	1796.7	2995.3	2411.7	6.333	13.671
CHUFSC 3448	Ischnocnema manezinho	3	0.696333	2036.8	3445.83	2871.07	8.667	12.51
Jaragua1	UCS3	8	0.96525	1393.4	3146.61	2153.35	7.875	8.335
UFMG 18500	UCS2	13	0.266308	1864.45	4365.86	3021.27	4.231	16.064
UFMG 18518	UCS2	12	0.15975	1879.38	4250.92	3158.2	3.333	21.23
UFMG 18679	UCS2	27	0.209481	2182.96	3861.05	3062.51	3.37	16.473
UFMG 18680	UCS2	8	0.19375	2072.3	3801.71	2584	3.5	18.417
UFMG 18681	UCS2	3	0.082	2403.23	4376.5	3502.73	2	24.422
CHUFSC 3446	UCS2	21	0.215524	2003.39	3565.74	2707.01	3	13.95
CHUFSC 3447	UCS2	25	0.22408	2087.59	3795.11	2962.96	3.12	13.988
UFMG 19187	UCS2	7	0.226571	2055.2	3620.57	2879.29	3.571	16.012
UFMG 19193	UCS2	7	0.132	2303.33	3627.37	2985.93	2.857	21.479
SaoBonifacio1	UCS5	5	0.2208	1455.5	3228.78	2308.38	4	15.133
SaoBonifacio2	UCS5	5	0.2226	1349.6	3437.86	2308.36	4	18.004

## Sheet: Table S5
Table S5 - Summary statistics from DNA data. To the analysis, we did not consider outgroup. *p>0.05, π = Nucleotide diversity, Hd = Haplotype diversity.
Gene	Size	Number of haplotypes	Hd	π	Segregating sites	Tajima’s D	Φ test’s (p-value)
cytb	798	37	0.975867	0.148195	462	-0.5078*	-
α-fib	497	32	0.929872	0.020044	93	-1.6543*	0.1091
β-fib	398	50	0.968568	0.027786	74	-1.1474*	0.02566
cxc	630	32	0.926685	0.017921	45	0.2316*	0.2556

## Sheet: Table S6
Table S6 - ASAP analysis showing ten partition for cyt-b dataset. We highlight in bold the best partition based in the lower ASAP-score. p-value = probability of panmixia; W = relative gap width metrics. See the Fig. S1 to observe the ranged and treshold distances of the best partition.
Number of species	asap-score	P-value (rank)	W (rank)	Treshold distance
8	2.5	7.32e-02 (4)	2.74e-03 (1)	0.09233
12	3.5	1.34e-02 (5)	1.59e-03 (2)	0.0132
9	4	4.00e-04 (1)	2.77e-04 (7)	0.059254
9	4	5.44e-03 (2)	3.74e-04 (6)	0.039738
9	5.5	2.34e-01 (7)	6.11e-04 (4)	0.073239
7	5.5	2.75e-01 (8)	1.26e-03 (3)	0.120303
5	6	6.30e-03 (3)	1.66e-04 (9)	0.158493
11	8	5.63e-01 (11)	5.19e-04 (5)	0.020639
14	8.5	1.78e-01 (6)	1.62e-04 (11)	0.0066406
5	13.5	7.96e-01 (15)	9.21e-05 (12)	0.188654

## Sheet: Table S7
Table S7 - Filds for recombination (FFR) for each fragment marker
Voucher ID	N° extraction	FFR
		α-fib	β-fib	cxc
UFMG-T 7238	IM01	3	10	3
UFMG-T 7239	IM02	3	1	3
UFMG-T 7240	IM03	3	1	3
UFMG-T 7241	IM04	1	2	2
UFMG-T 7242	IM05	1	2	2
UFMG-T 1913	IM06	1	4	2
UFMG-T 852	IM07	2	5	1
UFMG-T 7230	IM09	3	1	3
UFMG-T 7229	IM10	2	6	1
UFMG-T 7233	IM11	2	5	1
UFMG-T 7231	IM12	5	2	2
UFMG-T 7232	IM13	2	5	1
UFMG-T 7234	IM14	1	2	2
UFMG-T 7235	IM15	3	1	3
UFMG-T 7243	IM17	1	11	2
CHUFSC 2950	IM19	6	7	4
CHUFSC 2958	IM20	3	1	3
CHUFSC 3018	IM21	6	7	4
CHUFSC 3162	IM22	2	3	1
CHUFSC 3163	IM23	2	3	1
CHUFSC 3164	IM24	2	3	1
CHUFSC 3165	IM25	2	3	1
CHUFSC 3166	IM26	2	3	1
CHUFSC 3167	IM27	2	3	1
CHUFSC 3168	IM28	2	3	1
CHUFSC 3169	IM29	2	3	1
CHUFSC 3170	IM30	2	3	1
UFMG-T 7236	IM31	3	1	3
UFMG-T 7237	IM32	3	1	3
CZFURB 22108	IM33	5	2	2
CZFURB 23158	IM35	1	12	2
CZFURB 23187	IM36	1	2	2
CFBHT 3237	IM37	5	2	2
CFBHT 11179	IM38	7	8	5
CFBHT 18340	IM39	7	8	5
CFBHT 19697	IM40	4	6	6
CFBHT 19698	IM41	4	13	6
CFBHT 19707	IM42	4	6	6
CFBHT 19708	IM43	4	6	6
CFBHT 19755	IM44	1	4	10
MNRJ 72226	IM45	2	5	1
MNRJ 72227	IM46	2	5	1
CHSA 344	IM51	8	14	11
CHSA 345	IM52	8	15	7
CHSA 346	IM53	8	9	12
CHUFSC 3442	IM55	6	7	4
CHUFSC 3445	IM56	3	1	3
UFMG-T 7244	IM57	3	1	3
UFMG-T 7245	IM58	3	-	3
CHUFSC 3446	IM59	1	2	2
CHUFSC 3447	IM60	1	16	2
UFMG-T 7246	IM61	1	4	2
UFMG-T 7247	IM62	3	17	3
CHUFSC 3448	IM63	3	1	3
UFMG-T 7248	IM64	3	-	3
UFMG-T 7249	IM65	5	2	2
UFMG-T 7250	IM66	1	4	-
UFMG-T 7251	IM67	1	4	8
CHUFSC 3449	IM68	1	4	2
UFMG-T 7252	IM69	1	4	-
UFMG-T 7253	IM70	9	18	5
CHUFSC 3437	IM71	10	-	-
CHUFSC 3438	IM72	11	-	9
CHUFSC 3439	IM73	12	-	-

## Sheet: metadata
Body measurement	Legend	Reference
SVL	Snout-vent length	Watters et al., 2016
HL	Head lenght	Watters et al., 2016
HW	Head width	Watters et al., 2016
ED	Eye diameter	Watters et al., 2016
TD	Tympanum diameter	Watters et al., 2016
EN	Eye-nostril distance	Watters et al., 2016
NS	Snout-nostril lenght	Watters et al., 2016
IND	Internarial distance	Watters et al., 2016
UEW	Upper eyelid width	Watters et al., 2016
AMD	Distance between the anterior margins of eyes	Garcia, Vinciprova & Haddad, 2003
IOD	Interorbital distance	Watters et al., 2016
FLL	Forearm length	Watters et al., 2016
FAW	Forearm breadth	Watters et al., 2016
HAL	Hand length	Watters et al., 2016
Fin4DW	Finger IV disk width	Watters et al., 2016
THL	Thigh length	Watters et al., 2016
TL	Tibia length	Watters et al., 2016
TSL	Tarsus length	Watters et al., 2016
FL	Foot length	Watters et al., 2016
Toe4DW	Toe IV disk width	Watters et al., 2016
Reference
Garcia PCA, Vinciprova G, Haddad CFB. 2003. The Taxonomic Status of Hyla Pulchella Joaquini (Anura: Hylidae) With Description of Its Tadpole and Vocalization. Herpetologica 59(3):350–363. https://doi.org/10.1655/01-54
Watters JL, Cummings ST, Flanagan RL, Siler CD. 2016. Review of morphometric measurements used in anuran species descriptions and recommendations for a standardized approach. Zootaxa 4072(4):477–495. https://doi.org/10.11646/zootaxa.4072.4.6
